# Supplementary material
Source: PubMed Central journal article supplement (PMC4192472)
Supplement: supp_M114.593277_Table.pdf [file supp_M114.593277_Table.pdf]

TABLE S1 – Strains, plasmids, and primers used in this study.

### Strains

| <u>Strain</u> | <u>Genotype or relevant characteristics</u>                                               |
|---------------|-------------------------------------------------------------------------------------------|
| WN150         | “wild-type” <i>Salmonella enterica</i> serovar Typhimurium strain 14028s [2]              |
| WN1405        | $\Delta efp$ mutation (deletion of base-pairs 145-424) in WN150 [2]                       |
| BW25113       | “wild-type” <i>E. coli</i> , parental strain used for the Keio collection [1]             |
| MW1014        | $\Delta efp$ of Keio collection with kanamycin cassette removed using FLP recombinase [2] |

### Plasmids

| <u>Plasmid</u>                     | <u>Description</u>                                                                                                                                                             | <u>Reference</u> |
|------------------------------------|--------------------------------------------------------------------------------------------------------------------------------------------------------------------------------|------------------|
| <b>pXG10sf-LacZ</b>                | <b>pXG10sf plasmid for generating translational fusions to super-folder GFP.</b>                                                                                               | 4                |
| <b>pXG10sf-AtpD</b>                | <b>pXG10sf with AtpD ORF and 74bp upstream inserted between NsiI and NheI sites</b>                                                                                            | 2                |
| pXG10sf-AtpD P214L                 | pXG10sf-AtpD with the PPG motif mutated to PLG                                                                                                                                 | 2                |
| pXG10sf-AtpD - AtpA 12aa           | pXG10sf-AtpD with the 12 codons immediately upstream of the PPG motif replaced by those of AtpA                                                                                | 2                |
| pXG10sf-AtpD - AtpA 180-PPG        | pXG10sf-AtpD with codons 129-212 replaced with codons 180-279 of AtpA.                                                                                                         | this work        |
| pXG10sf-AtpD - AtpA 120-PPG        | pXG10sf-AtpD with codons 86-212 replaced with codons 120-279 of AtpA.                                                                                                          | this work        |
| pXG10sf-AtpD - AtpA 60-PPG         | pXG10sf-AtpD with codons 43-212 replaced with codons 60-279 of AtpA.                                                                                                           | this work        |
| pXG10sf-AtpD - AtpA ATG-PPG        | pXG10sf-AtpD with codons 1-212 replaced with codons 1-279 of AtpA.                                                                                                             | this work        |
| pXG10sf-AtpD - AtpA UTR-PPG        | pXG10sf-AtpD with 5' UTR and codons 1-212 replaced with 5' UTR and codons 1-279 of AtpA.                                                                                       | this work        |
| pXG10sf-AtpD - AtpA UTR            | pXG10sf-AtpD with the 5' UTR replaced by that of AtpA                                                                                                                          | this work        |
| pXG10sf-AtpD - AtpA UTR-60 & 12aa  | pXG10sf-AtpD with 5' UTR and codons 1-43 replaced with 5' UTR and codons 1-60 of AtpA, and with the 12 codons immediately upstream of the PPG motif replaced by those of AtpA  | this work        |
| pXG10sf-AtpD - AtpA UTR-120 & 12aa | pXG10sf-AtpD with 5' UTR and codons 1-86 replaced with 5' UTR and codons 1-120 of AtpA, and with the 12 codons immediately upstream of the PPG motif replaced by those of AtpA | this work        |

Table S1 *continued*

|                                                              |                                                                                                                                                                                 |           |
|--------------------------------------------------------------|---------------------------------------------------------------------------------------------------------------------------------------------------------------------------------|-----------|
| pXG10sf-AtpD - AtpA UTR-180 & 12aa                           | pXG10sf-AtpD with 5' UTR and codons 1-129 replaced with 5' UTR and codons 1-180 of AtpA, and with the 12 codons immediately upstream of the PPG motif replaced by those of AtpA | this work |
| pXG10sf-AtpD - AGAGG::AGAG <u>C</u>                          | pXG10sf-AtpD with point mutation altering the SD sequence to AGAG <u>C</u>                                                                                                      | this work |
| pXG10sf-AtpD - AGAGG::AGAC <u>G</u>                          | pXG10sf-AtpD with point mutation altering the SD sequence to AGAC <u>G</u>                                                                                                      | this work |
| pXG10sf-AtpD - AtpA UTR from -75-61                          | pXG10sf-AtpD with 5' UTR bases -74-61 replaced by bases -75-61 of AtpA                                                                                                          | this work |
| pXG10sf-AtpD - AtpA UTR from -60-46                          | pXG10sf-AtpD with 5' UTR bases -60-46 replaced by those of AtpA                                                                                                                 | this work |
| pXG10sf-AtpD - AtpA UTR from -45-31                          | pXG10sf-AtpD with 5' UTR bases -45-31 replaced by those of AtpA                                                                                                                 | this work |
| pXG10sf-AtpD - AtpA UTR from -30-16                          | pXG10sf-AtpD with 5' UTR bases -30-16 replaced by those of AtpA                                                                                                                 | this work |
| pXG10sf-AtpD - AtpA UTR from -15-1                           | pXG10sf-AtpD with 5' UTR bases -15-1 replaced by those of AtpA                                                                                                                  | this work |
| pXG10sf-AtpD - AGAGG::AG <u>G</u> AGG                        | pXG10sf-AtpD with G insertion to mutate the SD sequence to AG <u>G</u> AGG                                                                                                      | this work |
| pXG10sf-AtpD - AUG:: <u>G</u> UG                             | pXG10sf-AtpD with point mutation altering the start codon to <u>G</u> UG                                                                                                        | this work |
| pXG10sf-AtpD - AUG:: <u>U</u> UG                             | pXG10sf-AtpD with point mutation altering the start codon to <u>U</u> UG                                                                                                        | this work |
| pXG10sf-AtpD - AtpA UTR from -45-31 & AGAGG::AG <u>G</u> AGG | pXG10sf-AtpD with 5' UTR bases -45-31 replaced by those of AtpA <b>and</b> with G insertion to mutate the SD sequence to AG <u>G</u> AGG                                        | this work |
| pXG10sf-AtpD - AtpA UTR & P214L                              | pXG10sf-AtpD with the 5' UTR replaced by that of AtpA and with the PPG motif mutated to PLG                                                                                     | this work |
| pXG10sf-AtpD - AtpA UTR from -45-31 & P214L                  | pXG10sf-AtpD with 5' UTR bases -45-31 replaced by those of AtpA <b>and</b> with the PPG motif mutated to PLG                                                                    | this work |
| pXG10sf-AtpD - AtpA UTR & 12aa                               | pXG10sf-AtpD with the 5' UTR replaced by that of AtpA <b>and</b> with the 12 codons immediately upstream of the PPG motif replaced by those of AtpA                             | this work |
| pXG10sf-AtpD - AtpA 12aa & AGAGG::AG <u>G</u> AGG            | pXG10sf-AtpD with the 12 codons immediately upstream of the PPG motif replaced by those of AtpA <b>and</b> with G insertion to mutate the SD sequence to AG <u>G</u> AGG        | this work |
| pXG10sf-AtpD - AtpA UTR from -45-31 & 12aa                   | pXG10sf-AtpD with 5' UTR bases -45-31 replaced by those of AtpA <b>and</b> with the 12 codons immediately upstream of the PPG motif replaced by those of AtpA                   | this work |

Table S1 *continued*

|                                     |                                                                                                                                                                                 |           |
|-------------------------------------|---------------------------------------------------------------------------------------------------------------------------------------------------------------------------------|-----------|
| <b>pXG10sf-AtpA</b>                 | <b>pXG10sf [1] with AtpA ORF and 75bp upstream inserted between NsiI and NheI sites</b>                                                                                         | 2         |
| pXG10sf-AtpA R279P                  | pXG10sf-AtpA with the RPPG motif mutated to PPPG                                                                                                                                | 2         |
| pXG10sf-AtpA P281L                  | pXG10sf-AtpA with the PPG motif mutated to PLG                                                                                                                                  | 2         |
| pXG10sf-AtpA - AtpD 12aa            | pXG10sf-AtpA with the 12 codons immediately upstream of the PPG motif replaced by those of AtpD                                                                                 | 2         |
| pXG10sf-AtpA - AtpD 129-PPG         | pXG10sf-AtpA with codons 180-279 replaced with codons 129-212 of AtpD.                                                                                                          | this work |
| pXG10sf-AtpA - AtpD 86-PPG          | pXG10sf-AtpA with codons 120-279 replaced with codons 86-212 of AtpD.                                                                                                           | this work |
| pXG10sf-AtpA - AtpD 43-PPG          | pXG10sf-AtpA with codons 60-279 replaced with codons 43-212 of AtpD.                                                                                                            | this work |
| pXG10sf-AtpA - AtpD ATG-PPG         | pXG10sf-AtpA with codons 1-279 replaced with codons 1-212 of AtpD.                                                                                                              | this work |
| pXG10sf-AtpA - AtpD UTR-PPG         | pXG10sf-AtpA with 5' UTR and codons 1-279 replaced with 5' UTR and codons 1-212 of AtpD.                                                                                        | this work |
| pXG10sf-AtpA - AtpD UTR             | pXG10sf-AtpA with the 5' UTR replaced by that of AtpD                                                                                                                           | this work |
| pXG10sf-AtpA - AtpD UTR-43 & 12aa   | pXG10sf-AtpA with 5' UTR and codons 1-60 replaced with 5' UTR and codons 1-43 of AtpD, and with the 12 codons immediately upstream of the PPG motif replaced by those of AtpD   | this work |
| pXG10sf-AtpA - AtpD UTR-86 & 12aa   | pXG10sf-AtpA with 5' UTR and codons 1-120 replaced with 5' UTR and codons 1-86 of AtpD, and with the 12 codons immediately upstream of the PPG motif replaced by those of AtpD  | this work |
| pXG10sf-AtpA - AtpD UTR-129 & 12aa  | pXG10sf-AtpA with 5' UTR and codons 1-180 replaced with 5' UTR and codons 1-129 of AtpD, and with the 12 codons immediately upstream of the PPG motif replaced by those of AtpD | this work |
| pXG10sf-AtpA - AGGGGA::AGGAGG       | pXG10sf-AtpA with A base moved two positions upstream to alter the SD sequence to AGGAGG                                                                                        | this work |
| pXG10sf-AtpA - AtpD UTR from -74-61 | pXG10sf-AtpA with 5' UTR bases -75-61 replaced by bases -74-61 of AtpD                                                                                                          | this work |
| pXG10sf-AtpA - AtpD UTR from -60-46 | pXG10sf-AtpA with 5' UTR bases -60-46 replaced by those of AtpD                                                                                                                 | this work |
| pXG10sf-AtpA - AtpD UTR from -45-31 | pXG10sf-AtpA with 5' UTR bases -45-31 replaced by those of AtpD                                                                                                                 | this work |
| pXG10sf-AtpA - AtpD UTR from -30-16 | pXG10sf-AtpA with 5' UTR bases -30-16 replaced by those of AtpD                                                                                                                 | this work |

Table S1 *continued*

|                                                    |                                                                                                                                                                                        |           |
|----------------------------------------------------|----------------------------------------------------------------------------------------------------------------------------------------------------------------------------------------|-----------|
| pXG10sf-AtpA - AtpD UTR from -15-1                 | pXG10sf-AtpA with 5' UTR bases -15-1 replaced by those of AtpD                                                                                                                         | this work |
| pXG10sf-AtpA - AtpD UTR & AGAGG::AGGAGG            | pXG10sf-AtpA with the 5' UTR replaced by that of AtpD and with G insertion to mutate the SD sequence to AGGAGG                                                                         | this work |
| pXG10sf-AtpA - AtpD UTR from -30-1                 | pXG10sf-AtpA with 5' UTR bases -30-1 replaced by those of AtpD                                                                                                                         | this work |
| pXG10sf-AtpA - AtpD UTR from -30-1 & AGAGG::AGGAGG | pXG10sf-AtpA with 5' UTR bases -30-1 replaced by those of AtpD <b>and</b> with G insertion to mutate the SD sequence to AGGAGG                                                         | this work |
| pXG10sf-AtpA -AtpD UTR & P281L                     | pXG10sf-AtpA with the 5' UTR replaced by that of AtpD <b>and</b> with the PPG motif mutated to PLG                                                                                     | this work |
| pXG10sf-AtpA - AtpD 12aa & AGGGGA::AGGAGG          | pXG10sf-AtpA with the 12 codons immediately upstream of the PPG motif replaced by those of AtpD <b>and</b> with A base moved two positions upstream to alter the SD sequence to AGGAGG | this work |
| <b>pBAD30XS</b>                                    | <b>pBAD30mw700 [2] with an xhoI &amp; an speI cloning site at forth codon position of gfp</b>                                                                                          | 3         |
| pBAD30XSG                                          | pBAD30XS with start codon changed from AUG to GUG                                                                                                                                      | this work |
| pBAD30XST                                          | pBAD30XS with start codon changed from AUG to UUG                                                                                                                                      | this work |
| pBAD30XSA                                          | pBAD30XS with start codon changed from AUG to AUC                                                                                                                                      | this work |
| pBAD30XSC                                          | pBAD30XS with start codon changed from AUG to CUG                                                                                                                                      | this work |
| <b>pBAD30XS2</b>                                   | <b>pBAD30XS with PPPPP inserted between the xhoI and speI sites</b>                                                                                                                    | 3         |
| pBAD30XS2G                                         | pBAD30XS2 with start codon changed from AUG to GUG                                                                                                                                     | this work |
| pBAD30XS2T                                         | pBAD30XS2 with start codon changed from AUG to UUG                                                                                                                                     | this work |
| pBAD30XS2A                                         | pBAD30XS2 with start codon changed from AUG to AUC                                                                                                                                     | this work |
| pBAD30XS2C                                         | pBAD30XS2 with start codon changed from AUG to CUG                                                                                                                                     | this work |
| <b>pBAD30XS63</b>                                  | <b>pBAD30XS with LPPP (yeiG) inserted between the xhoI and speI sites</b>                                                                                                              | 3         |
| pBAD30XS63G                                        | pBAD30XS63 with start codon changed from AUG to GUG                                                                                                                                    | this work |
| pBAD30XS63T                                        | pBAD30XS63 with start codon changed from AUG to UUG                                                                                                                                    | this work |
| pBAD30XS63A                                        | pBAD30XS63 with start codon changed from AUG to AUC                                                                                                                                    | this work |
| pBAD30XS63C                                        | pBAD30XS63 with start codon changed from AUG to CUG                                                                                                                                    | this work |
| <b>pBAD30XS71</b>                                  | <b>pBAD30XS with MGLDPGLRTG inserted between the xhoI and speI sites</b>                                                                                                               | this work |

Table S1 *continued*

|                   |                                                                    |           |
|-------------------|--------------------------------------------------------------------|-----------|
| pBAD30XS71G       | pBAD30XS71 with start codon changed from AUG to GUG                | this work |
| pBAD30XS71T       | pBAD30XS71 with start codon changed from AUG to UUG                | this work |
| pBAD30XS71A       | pBAD30XS71 with start codon changed from AUG to AUC                | this work |
| pBAD30XS71C       | pBAD30XS71 with start codon changed from AUG to CUG                | this work |
| <b>pBAD30XS75</b> | <b>pBAD30XS with PPPP inserted between the xhoI and speI sites</b> | this work |
| pBAD30XS75G       | pBAD30XS75 with start codon changed from AUG to GUG                | this work |
| pBAD30XS75T       | pBAD30XS75 with start codon changed from AUG to UUG                | this work |
| pBAD30XS75A       | pBAD30XS75 with start codon changed from AUG to AUC                | this work |
| pBAD30XS75C       | pBAD30XS75 with start codon changed from AUG to CUG                | this work |

## Primers

| <u>Purpose</u>               | <u>Cloning details</u>                                                               | <u>Primer Name</u>                                       | <u>Primer Sequence (5' to 3')</u>                                 |
|------------------------------|--------------------------------------------------------------------------------------|----------------------------------------------------------|-------------------------------------------------------------------|
| pXG10sf-AtpD -<br>AtpA #-PPG | Inserts using pXG10sf-<br>AtpA as template [3].<br>Inserted by Gibson<br>cloning [5] | atpA PPG R                                               | ATGCAACGCGCAGACGGTTTCCCGGCGGACGACGGAGCA<br>GCAGGGAGATCTGAC        |
|                              |                                                                                      | atpA 180 F                                               | GTCAAACCTCTCAGGAACTGCTGGAAACCGACGCCATCATC<br>AACCAGCGCGACTCC      |
|                              |                                                                                      | atpA 120 F                                               | AGTCCCGGTAGGTAAAGCTACGCTGGGTGTTGATAATGAC<br>GGCTTCTCTGCCGTTGAAGC  |
|                              |                                                                                      | atpA 60 F                                                | TGGTAATGAGAAGCTGGTGTCTGGAAGTTGCTATCGCACTG<br>AACCTGGAGCGCGAC      |
|                              |                                                                                      | atpA ATG F                                               | AACCAGGTTATTTTCGTAGAGGATTTAAGATGCAACTGAAT<br>TCCACCGAAATCAGCGAACT |
|                              |                                                                                      | UTR F                                                    | CGCCCGGTAGTGATCTTATTTTCATTATGGTG                                  |
|                              |                                                                                      | ATW plasmid fragments using pXG10sf-AtpD as template [3] | atpD PPG F                                                        |
|                              | atpD 129 R                                                                           | GGTTTCCAGCAGTTCCTGAGAGTTTGAC                             |                                                                   |
|                              | atpD 86 R                                                                            | ACCCAGCGTAGCTTTACCTACCG                                  |                                                                   |
|                              | atpD 43 R                                                                            | AACTTCCAGCACCAGCTTCTCATTACC                              |                                                                   |
|                              | atpD ATG R                                                                           | CTTAAATCCTCTACGAAATAACCTGGTTAAACCGC                      |                                                                   |

Table S1 *continued*

|                                     |                                                                               |            |                                          |
|-------------------------------------|-------------------------------------------------------------------------------|------------|------------------------------------------|
| pXG10sf-AtpA -<br>AtpD #-PPG        | Inserts using pXG10sf-AtpD as template [3].<br>Inserted by Gibson cloning [5] | UTR R      | GAGACGTTGATTGGCACGTAAGAGGTTCCAAC         |
|                                     |                                                                               | atpD PPG R | CGCCCGGGAATGCTTCACGTCCTGGCGGCTCGTTCATCTG |
|                                     |                                                                               | atpD 129 F | GCCATACACCAGGG                           |
|                                     |                                                                               | atpD 86 F  | AGACCGGTAAAACCGCGCTGGCTATCGGTATCAAAGTTAT |
|                                     |                                                                               | atpD 43 F  | CGACCTGATGTGTCCGTTTCG                    |
|                                     |                                                                               | atpD ATG F | GGGTGCGCCAATTGACGGTAAAGGTCCGCGTATCATGAAC |
|                                     |                                                                               | UTR F      | GTCCTGGGCGAACCGG                         |
|                                     |                                                                               | atpA PPG F | AATGATCTCCCTGCCGGGTAACCGTTACCAGCAGCAGCTT |
|                                     |                                                                               | atpA 180 R | GGCGGCGGTATTGTG                          |
|                                     |                                                                               | atpA 120 R | CGTCTTGCAGTCTTAAGGGGACTGGAGCATGGCTACTGGA |
| pXG10sf-AtpD -<br>AtpA UTR-# & 12aa | ATW plasmid fragments using pXG10sf-AtpA as template [3]                      | atpA 60 R  | AAGATTGTCCAGGTAATCGG                     |
|                                     |                                                                               | atpA ATG R | as above                                 |
|                                     |                                                                               | UTR R      | CCGCCAGGACGTGAAGCATTCCC                  |
|                                     |                                                                               | atpA PPG F | GATAGCCAGCGCGGTTTTACCGG                  |
|                                     |                                                                               | atpA 180 R | CGGACCTTTACCGTCAATTGGCGC                 |
|                                     |                                                                               | atpA 120 R | GTAACGGTTACCCGGCAGGGAGATC                |
|                                     |                                                                               | atpA 60 R  | GCTCCAGTCCCCTTAAGACTGCAAGAC              |
|                                     |                                                                               | atpA ATG R | as above                                 |
|                                     |                                                                               | UTR R      | as above                                 |
|                                     |                                                                               | UTR F      | as above                                 |
| pXG10sf-AtpA -<br>AtpD UTR-# & 12aa | Inserts using pXG10sf-AtpD - AtpA 12aa as template [3]                        | atpA ATG R | as above                                 |
|                                     |                                                                               | atpA 60 R  | as above                                 |
|                                     |                                                                               | atpA 120 R | as above                                 |
|                                     |                                                                               | atpA 180 R | as above                                 |
|                                     |                                                                               | atpD ATG F | as above                                 |
|                                     |                                                                               | atpD 43 F  | as above                                 |
|                                     |                                                                               | atpD 86 F  | as above                                 |
|                                     |                                                                               | atpD 129 F | as above                                 |
|                                     |                                                                               | UTR F      | as above                                 |
|                                     |                                                                               | atpD ATG R | as above                                 |
| pXG10sf-AtpA -<br>AtpD UTR-# & 12aa | Inserts using pXG10sf-AtpD as template [3].<br>Inserted by Gibson             | atpD 43 R  | as above                                 |
|                                     |                                                                               | atpD 43 R  | as above                                 |

Table S1 *continued*

|                                     |                                                                      |                 |                                                                  |
|-------------------------------------|----------------------------------------------------------------------|-----------------|------------------------------------------------------------------|
|                                     | cloning [5]                                                          | atpD 86 R       | as above                                                         |
|                                     |                                                                      | atpD 129 R      | as above                                                         |
|                                     | ATW plasmid fragments using pXG10sf-AtpA - AtpD 12aa as template [3] | UTR R           | as above                                                         |
|                                     |                                                                      | atpA ATG F      | as above                                                         |
|                                     |                                                                      | atpA 60 F       | as above                                                         |
|                                     |                                                                      | atpA 120 F      | as above                                                         |
|                                     |                                                                      | atpA 180 F      | as above                                                         |
| pXG10sf-AtpD - AtpA UTR from -75-61 | ATW PCR followed by Gibson cloning [5]                               | atpD-A -75-61 F | CACATGCATATGGTCATTGATGGCCACCGAGATCGTCTCG<br>GGGGCCGC             |
|                                     |                                                                      | atpD-A -75-61 R | GCCATCAATGACCATATGCATGTGCTCAGTATCTCTATCAC<br>TGATAGGGATGTCAATCTC |
| pXG10sf-AtpD - AtpA UTR from -60-46 | ATW PCR and Gibson cloning [5]                                       | atpD-A -60-46 F | GAGTATTACTCAGGAAGTACGCTACGCGGCCGTGGGGGCC<br>GCCGCGGTTAAC         |
|                                     |                                                                      | atpD-A -60-46 R | TACGCTAGTTCCTGAGTAATACTCAGTATCTCTATCACTGA<br>TAGGGATGTC          |
| pXG10sf-AtpD - AtpA UTR from -45-31 | ATW PCR and Gibson cloning [5]                                       | atpD-A -45-31 F | CTTGAGCGCCTTGCATTAACCAGGTTATTTTCGTAGAGGATT<br>TAAGATGGC          |
|                                     |                                                                      | atpD-A -45-31 R | TGGTTAATGCAAGGCGCTCAAGGAGACGATCTCGGTGAGT<br>TCCTGAG              |
| pXG10sf-AtpD - AtpA UTR from -30-16 | ATW PCR and Gibson cloning [5]                                       | atpD-A -30-16 F | TGACGTCTTGCAGTCTCGTAGAGGATTTAAGATGGCTACT<br>GGAAAGATTGTCCAGG     |
|                                     |                                                                      | atpD-A -30-16 R | CCTCTACGAGACTGCAAGACGTCACCGCGGCGGCCCCCGA<br>GACGATC              |
| pXG10sf-AtpD - AtpA UTR from -15-1  | ATW PCR and Gibson cloning [5]                                       | atpD-A -15-1 F  | TTATTTTAAGGGGACTGGAGCATGGCTACTGGAAAGATTG<br>TCCAGG               |
|                                     |                                                                      | atpD-A -15-1 R  | CATGCTCCAGTCCCCTTAAAATAACCTGGTTAAACCGCGG<br>CG                   |
| pXG10sf-AtpA - AtpD UTR from -74-61 | ATW PCR and Gibson cloning [5]                                       | atpA-D -75-61 F | ATACTGAGTATTACTCAGGAAGTACGCTACGCGGCCGTCT<br>TGAG                 |
|                                     |                                                                      | atpA-D -75-61 R | TAGTTCCTGAGTAATACTCAGTATCTCTATCACTGATAGGG<br>ATGTCAATC           |
| pXG10sf-AtpA - AtpD UTR from -60-46 | ATW PCR and Gibson cloning [5]                                       | atpA-D -60-46 F | ATGGCCACCGAGATCGTCTCCTTGAGCGCCTTGCAGACGT<br>CTTGC                |
|                                     |                                                                      | atpA-D -60-46 R | AAGGAGACGATCTCGGTGGCCATCAATGACCATATGCATG<br>TGCTCAGTATCTC        |

Table S1 *continued*

|                                               |                                   |                                          |                                                                                                                   |
|-----------------------------------------------|-----------------------------------|------------------------------------------|-------------------------------------------------------------------------------------------------------------------|
| pXG10sf-AtpA -<br>AtpD UTR from -45-<br>31    | ATW PCR and Gibson<br>cloning [5] | atpA-D -45-31 F<br><br>atpA-D -45-31 R   | TGGGGGCCGCGCGGTGACGTCTTGCAGTCTTAAGGGGAC<br>TGGAGCATGC<br>TCACCGCGGCGGCCCCACGGCCGCGTACGCTGCCATCAA<br>TGACC         |
| pXG10sf-AtpA -<br>AtpD UTR from -30-<br>16    | ATW PCR and Gibson<br>cloning [5] | atpA-D -30-16 F<br><br>atpA-D -30-16 R   | TGCATTAACCAGGTTATTTTAAGGGGACTGGAGCATGCAA<br>CTG<br>CCTTAAAATAACCTGGTTAATGCAAGGCGCTCAAGACGGC<br>C                  |
| pXG10sf-AtpA -<br>AtpD UTR from -15-<br>1     | ATW PCR and Gibson<br>cloning [5] | atpA-D -15-1 F<br><br>atpA-D -15-1 R     | TCTCGTAGAGGATTTAAGATGCAACTGAATTCCACCGAAA<br>TCAGCG<br>TTGCATCTTAAATCCTCTACGAGACTGCAAGACGTCTGCA<br>AGGC            |
| pXG10sf-AtpD -<br>AGAGG::AGAG <u>C</u>        | ATW PCR and Gibson<br>cloning [5] | atpD GAGC SD F<br><br>atpD GAGC SD R     | TTATTTTCGTAGAGCATTTAAGATGGCTACTGGAAAGATTG<br>TCCAGG<br>CATCTTAAATGCTCTACGAAATAACCTGGTTAAACCGCGG<br>C              |
| pXG10sf-AtpD -<br>AGAGG::AGAG <u>C</u> G      | ATW PCR and Gibson<br>cloning [5] | atpD GACG SD F<br><br>atpD GACG SD R     | TTATTTTCGTAGACGATTTAAGATGGCTACTGGAAAGATTG<br>TCCAGG<br>CATCTTAAATCGTCTACGAAATAACCTGGTTAAACCGCGG<br>C              |
| pXG10sf-AtpD -<br>AGAGG::AG <u>G</u> AGG      | ATW PCR and Gibson<br>cloning [5] | atpD start mut F<br><br>atpD AGGAGG SD R | TGGCTACTGGAAAGATTGTCCAGGTAATCGGCGCCGTGGT<br>CG<br>TGGACAATCTTTCCAGTAGCCATCTTAAATCCTCCTACGAA<br>ATAACCTGGTTAAACCGC |
| pXG10sf-AtpA -<br>AGGGGA::AGG <u>A</u> G<br>G | ATW PCR and Gibson<br>cloning [5] | atpA AGGAGG SD F<br><br>atpA AGGAGG SD R | AGTCTTAAGGAGGCTGGAGCATGCAACTGAATTCCACCG<br>ATGCTCCAGCCTCCTTAAGACTGCAAGACGTCTGCAAGGC<br>G                          |
| pXG10sf-AtpD -<br>AUG:: <u>G</u> UG           | ATW PCR and Gibson<br>cloning [5] | atpD start mut F<br><br>atpD GTG start R | as above<br>TGGACAATCTTTCCAGTAGCCACCTTAAATCCTCCTACGAA<br>ATAACCTGGTTAAACCGC                                       |
| pXG10sf-AtpD -<br>AUG:: <u>U</u> UG           | ATW PCR and Gibson<br>cloning [5] | atpD start mut F<br><br>atpD TTG start R | as above<br>TGGACAATCTTTCCAGTAGCCAACTTAAATCCTCCTACGAA<br>ATAACCTGGTTAAACCGC                                       |
| pXG10sf-AtpD -                                | ATW PCR and Gibson                | atpD start mut F                         | as above                                                                                                          |



Table S1 *continued*

|                                                    |                                                                                |                                               |                                                                                        |
|----------------------------------------------------|--------------------------------------------------------------------------------|-----------------------------------------------|----------------------------------------------------------------------------------------|
| AtpA UTR from -45-31 & AGAGG::AGGAGG               | cloning [5] using pXG10sf-AtpD - AtpA UTR from -45-31 as template              | atpD-A UTR 30-44 AGGAGG SD R                  | TGGACAATCTTTCCAGTAGCCATCTTAAATCCTCCTACGAAATAACCTGGTTAATGCAAG                           |
| pXG10sf-AtpD - AtpA UTR & P214L                    | ATW PCR and Gibson cloning [5] using pXG10sf-AtpD - AtpA UTR as template       | atpD P214L SDM F [3]<br>atpD P214L SDM R [3]  | TGGCCAGATGAACGAGCCGCTGGGAAACCGTCTGCGCGTTG<br>CAACGCGCAGACGGTTTCCCAGCGGCTCGTTCATCTGGCCA |
| pXG10sf-AtpD - AtpA UTR from -45-31 & P214L        | ATW PCR and Gibson cloning [5] using pXG10sf-AtpD P214L as template            | atpD-A -45-31 F<br>atpD-A -45-31 R            | as above<br>as above                                                                   |
| pXG10sf-AtpD - AtpA UTR from -45-31 & 12aa         | ATW PCR and Gibson cloning [5] using pXG10sf-AtpD 12aa as template             | atpD-A -45-31 F<br>atpD-A -45-31 R            | as above<br>as above                                                                   |
| pXG10sf-AtpD - AtpA 12aa & AGAGG::AGGAGG           | ATW PCR and Gibson cloning [5] using pXG10sf-AtpD - AtpA 12aa as template      | atpD start mut F<br>atpD AGGAGG SD R          | as above<br>as above                                                                   |
| pXG10sf-AtpA - AtpD UTR & AGAGG::AGGAGG            | ATW PCR and Gibson cloning [5] using pXG10sf-AtpA - AtpD UTR as template       | atpD start mut F<br>atpA-D UTR AGGAGG SD R    | as above<br>TTCGGTGGAATTCAGTTGCATCTTAAATCCTCCTACGAAATAACCTGGTTAAACCGCGGC               |
| pXG10sf-AtpA - AtpD UTR from -30-1                 | ATW PCR and Gibson cloning [5] using pXG10sf-AtpA - AtpD UTR -15-1 as template | atpA ATG F<br>atpA-D UTR 30-1 R               | as above<br>CTACGAAATAACCTGGTTAATGCAAGGCGCTCAAGACGGCCGCG                               |
| pXG10sf-AtpA - AtpD UTR from -30-1 & AGAGG::AGGAGG | ATW PCR and Gibson cloning [5] using pXG10sf-AtpA - AtpD UTR -15-1 as template | atpA-D UTR 30-1 AGGAGG F<br>atpA-D UTR 30-1 R | AACCAGGTTATTTTCGTAGGAGGATTTAAGATGCAACTGAA<br>TTCCACCGAAATCAGCGAAC<br>as above          |
| pXG10sf-AtpA - AtpD UTR & P281L                    | ATW PCR and Gibson cloning [5] using                                           | atpA P281L SDM F [3]                          | CCTGCTGCTCCGTCGTCCGCTGGGACGTGAAGCATTCCCGGCGACGTATTCTACCTCC                             |

Table S1 *continued*

|                                           |                                                                           |                      |                                                                 |
|-------------------------------------------|---------------------------------------------------------------------------|----------------------|-----------------------------------------------------------------|
|                                           | pXG10sf-AtpA - AtpD UTR as template                                       | atpA P281L SDM R [3] | CCCGGGAATGCTTCACGTCCCAGCGGACGACGGAGCAGC<br>AGGGAGATCTGACGGTAAGC |
| pXG10sf-AtpA - AtpD 12aa & AGGGGA::AGGAGG | ATW PCR and Gibson cloning [5] using pXG10sf-AtpA - AtpD 12aa as template | atpA AGGAGG SD F     | as above                                                        |
| G                                         |                                                                           | atpA AGGAGG SD R     | as above                                                        |
| Replace AUG with GUG in pBADXS            | Site directed mutagenesis (SDM)                                           | 1FS                  | AATTCAGGAGGAATTTACCGTGAGTAAAC                                   |
|                                           |                                                                           | 1RS                  | TCGAGTTTACTCACGGTAAATTCCTCCTG                                   |
| Replace AUG with UUG in pBADXS            | SDM                                                                       | 2FS                  | AATTCAGGAGGAATTTACCTTGAGTAAAC                                   |
|                                           |                                                                           | 2RS                  | TCGAGTTTACTCAAGGTAAATTCCTCCTG                                   |
| Replace AUG with CUG in pBADXS            | SDM                                                                       | 3FS                  | AATTCAGGAGGAATTTACCCTGAGTAAAC                                   |
|                                           |                                                                           | 3RS                  | TCGAGTTTACTCAGGGTAAATTCCTCCTG                                   |
| Replace AUG with AUC in pBADXS            | SDM                                                                       | 4FS                  | AATTCAGGAGGAATTTACCATCAGTAAAC                                   |
|                                           |                                                                           | 4RS                  | TCGAGTTTACTGATGGTAAATTCCTCCTG                                   |

**Table S1 References**

1. Baba T, Ara T, Hasegawa M, Takai Y, Okumura Y, Baba M, Datsenko KA, Tomita M, Wanner B, Mori H (2006) Construction of Escherichia coli K-12 in-frame, single-gene knockout mutants: the Keio collection. *Mol Syst Biol* 2: 2006 0008.
2. Hersch SJ, Wang M, Zou SB, Moon KM, Foster LJ, Ibba M, Navarre WW (2013) Divergent protein motifs direct elongation factor P-mediated translational regulation in Salmonella enterica and Escherichia coli. *MBio* 4: e00180-00113.
3. Elgamal S, Katz A, Hersch SJ, Newsom D, White P, Navarre WW, Ibba M (2014 *in review*) EF-P dependent pauses integrate proximal and distal signals during translation. *In review at the time of submission*
4. Corcoran CP, Podkaminski D, Papenfort K, Urban JH, Hinton JC, Vogel J (2012) Superfolder GFP reporters validate diverse new mRNA targets of the classic porin regulator, MicF RNA. *Mol Microbiol* 84: 428-445.
5. Gibson DG, Young L, Chuang RY, Venter JC, Hutchison CA, Smith HO (2009) Enzymatic assembly of DNA molecules up to several hundred kilobases. *Nat Meth* 5: 343-345
